# Supplementary material for: Nucleic acid binding properties of thyminyl and adeninyl pyrrolidine-amide oligonucleotide mimics (POM)This paper is dedicated to Professor Heinz G. Floss on the occasion of his 70th birthday.Electronic supplementary information (ESI) available: experimental details. See http://www.rsc.org/suppdata/cc/b3/b315768g/
Source: Royal Society of Chemistry journal article supplement (doi:10.1039/b315768g), 2004-01-01
Supplement: b315768g.pdf [file b315768g.pdf]

## Electronic Supplementary Information (ESI)

### **Nucleic Acid Binding Properties of Thymynyl and Adenynyl Pyrrolidine–Amide Oligonucleotide Mimics (POM)**

T. H. Samuel Tan, David T. Hickman, Jordi Morral, Ian G. Beadham and  
Jason Micklefield\*

*Department of Chemistry, University of Manchester Institute of Science and Technology,  
PO Box 88, Manchester, M60 1QD, UK.*

*Tel: 0161 200 4509; Fax: 0161 236 7677; Email: [jason.micklefield@umist.ac.uk](mailto:jason.micklefield@umist.ac.uk)*

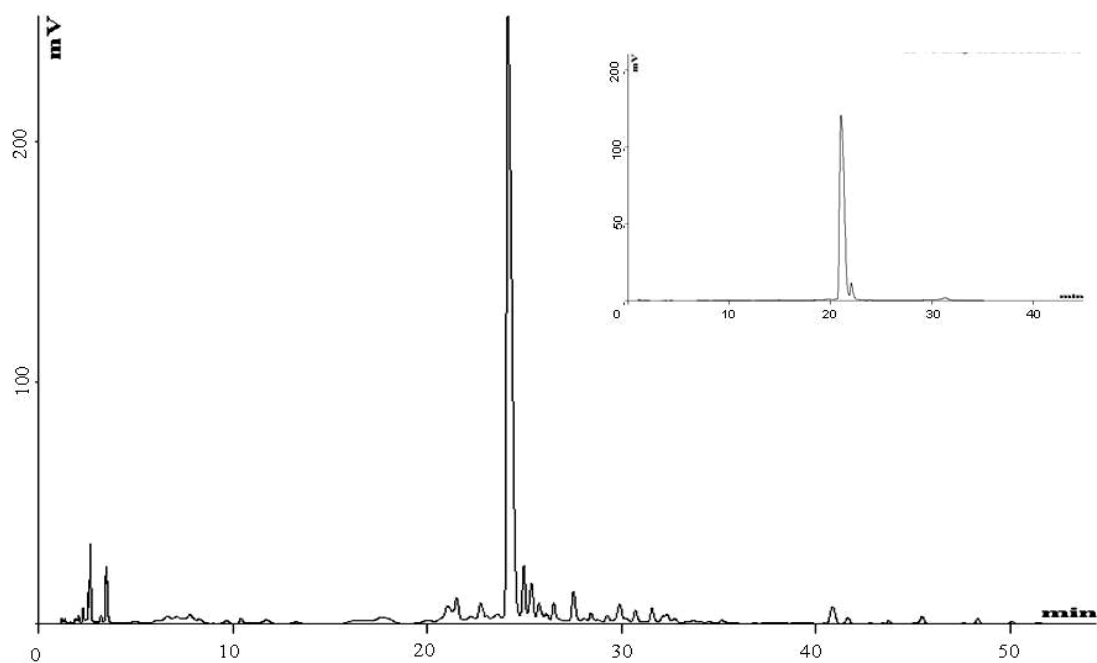

**Figure 1.** Reverse-phase HPLC chromatogram of Lys-POM(T)<sub>5</sub>-LysNH<sub>2</sub>: Kromasil C8, 3.5  $\mu$  (250 x 4.6 mm) column; solvent A, 0.1% formic acid in H<sub>2</sub>O; solvent B, CH<sub>3</sub>CN; Flow rate 1 mLmin<sup>-1</sup>; 100% A for 5min. then a gradient elution of 0% to 5% B in A over 30 min. Inset: HPLC chromatogram of pure Lys-POM(T)<sub>5</sub>-LysNH<sub>2</sub>.

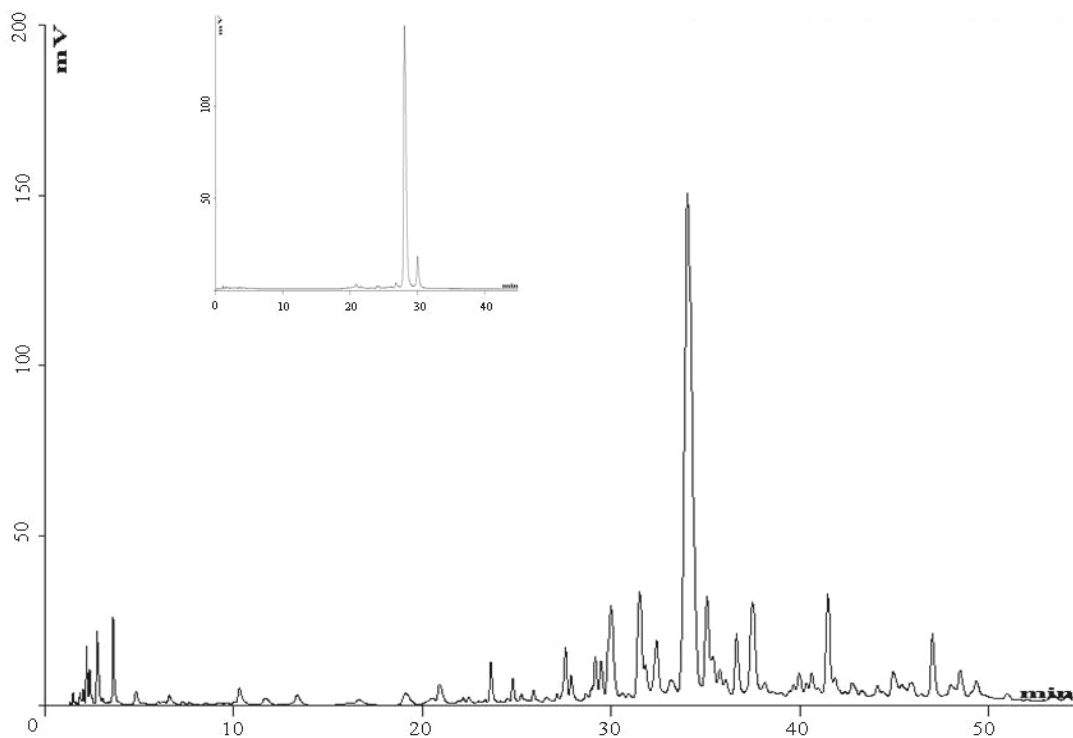

**Figure 2.** Reverse-phase HPLC chromatogram of crude Lys-POM(A)<sub>5</sub>-NH<sub>2</sub> after on-resin adenyl deprotection. HPLC conditions as above. Inset: HPLC chromatogram of pure Lys-POM(A)<sub>5</sub>-NH<sub>2</sub>.

**Table 1.** Mass to charge ratios observed by ES-MS for POM oligomers.

| POM                                                                                                                                | Observed $m/z$ | Required $m/z$            | Corresponding peaks      |
|------------------------------------------------------------------------------------------------------------------------------------|----------------|---------------------------|--------------------------|
| <b>Lys-POM(T)<sub>5</sub>-LysNH<sub>2</sub></b><br>C <sub>72</sub> H <sub>107</sub> N <sub>25</sub> O <sub>17</sub><br>MW: 1593.83 | 819.9          | 819.9                     | [M+2Na] <sup>2+</sup>    |
|                                                                                                                                    | 808.9          | 808.9                     | [M+H+Na] <sup>2+</sup>   |
|                                                                                                                                    | 797.9          | 797.9                     | [M+2H] <sup>2+</sup>     |
|                                                                                                                                    | 545.3          | 544.9                     | [M+2H+K] <sup>3+</sup>   |
|                                                                                                                                    | 532.3          | 532.3                     | [M+3H] <sup>3+</sup>     |
|                                                                                                                                    | 409.7          | 410.4                     | [M+2H+2Na] <sup>4+</sup> |
| <b>Lys-POM(A)<sub>5</sub>-NH<sub>2</sub></b><br>C <sub>66</sub> H <sub>90</sub> N <sub>38</sub> O <sub>6</sub><br>MW: 1510.79      | 344.6          | 344.6                     | [M+4Na+K] <sup>5+</sup>  |
|                                                                                                                                    | 778.8          | 778.4                     | [M+2Na] <sup>2+</sup>    |
|                                                                                                                                    | 767.4          | 767.4                     | [M+H+Na] <sup>2+</sup>   |
|                                                                                                                                    | 756.8          | 756.4                     | [M+2H] <sup>2+</sup>     |
|                                                                                                                                    | 504.6          | 504.6                     | [M+3H] <sup>3+</sup>     |
|                                                                                                                                    | 517.5          | 517.3                     | [M+2H+K] <sup>3+</sup>   |
|                                                                                                                                    | 388.9          | 388.2                     | [M+3H+K] <sup>4+</sup>   |
|                                                                                                                                    | 378.7          | 278.7                     | [M+4H] <sup>4+</sup>     |
| 324.4                                                                                                                              | 323.9          | [M+H+3Na+K] <sup>5+</sup> |                          |
| 316.4                                                                                                                              | 314.2          | [M+2H+3Na] <sup>5+</sup>  |                          |

ESI spectra of all POM oligomers show multiply charged quasi-molecular ions (e.g. [M+zH]<sup>z+</sup>) and exhibit the expected molecular ion charged state distribution. The reason for observing this distribution pattern is because of the relatively little fragmentation caused by the electrospray ionisation technique. The width of the distribution and most abundant multiply charged state is usually at about half the value of the highest charge state.<sup>[1]</sup> That is to say the total number of charged state possible for Lys-POM(T)<sub>5</sub>-LysNH<sub>2</sub> is 8+ and thus the most abundant charged state for this oligomer should be about 4+ (Figure 3,  $m/z$  [M+2H+2Na]<sup>4+</sup>: 409.7). The most abundant charged states observed for POM oligomers by ES-MS are hence in good agreement with the total number of sites possible for protonation under acidic conditions. <sup>13</sup>C/<sup>12</sup>C isotopic relationships of Lys-POM(T)<sub>5</sub>-LysNH<sub>2</sub> is illustrated in Figure 3. The separation of 0.5 amu by [M+2H]<sup>2+</sup> and [M+H+Na]<sup>2+</sup> ion peaks, 0.33 amu by [M+3H]<sup>3+</sup> ion peaks and 0.25 amu by [M+2H+2Na]<sup>4+</sup> ion peaks agrees with the actual charge count further supporting the identity of this oligomer.

[1] R. D. Smith, J. A. Loo, C. G. Edmonds, C. J. Barinaga, H. R. Udseth, *Anal. Chem.* **1990**, *62*, 882-899.

ST/SP4

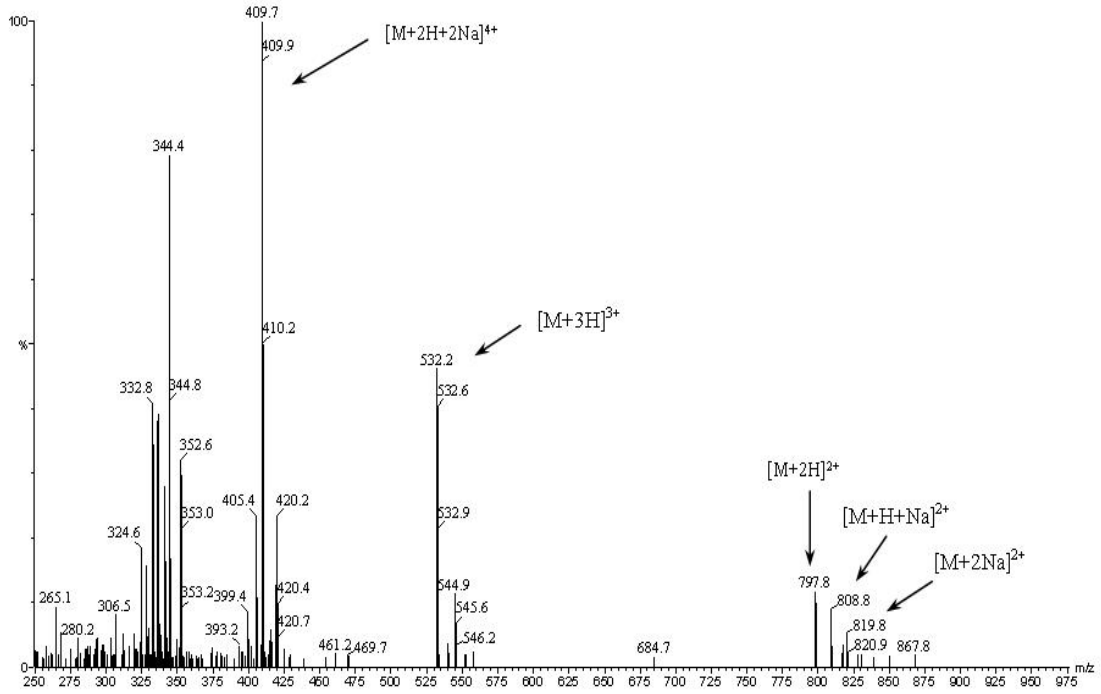

S T / S 2 4

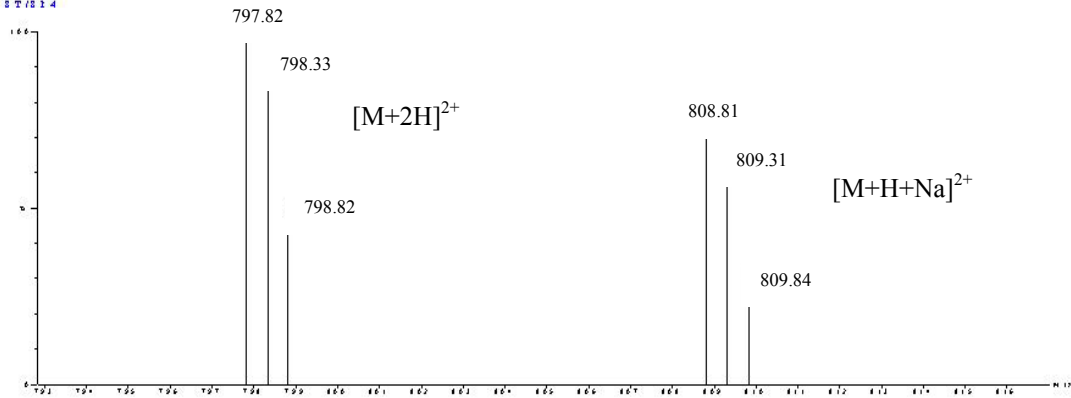

S T / S 2 4

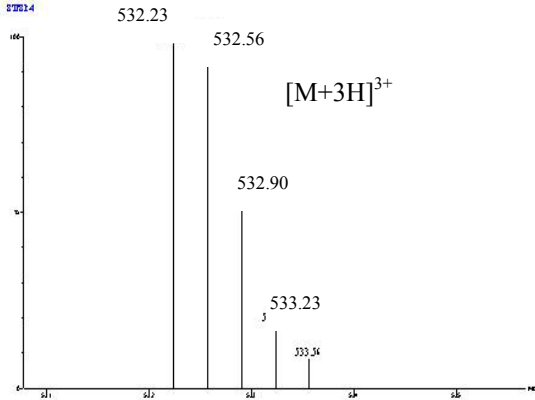

S T / S 2 4

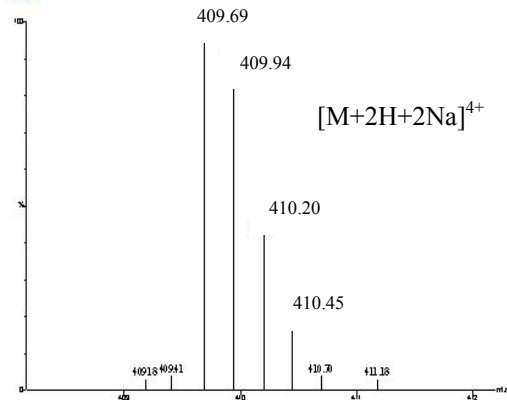

**Figure 3.** ES-MS spectra of Lys-POM(T)<sub>5</sub>-LysNH<sub>2</sub> and expansion of peak clusters for doubly, triply and quadruply charged regions

ST/SP7(POMA5)

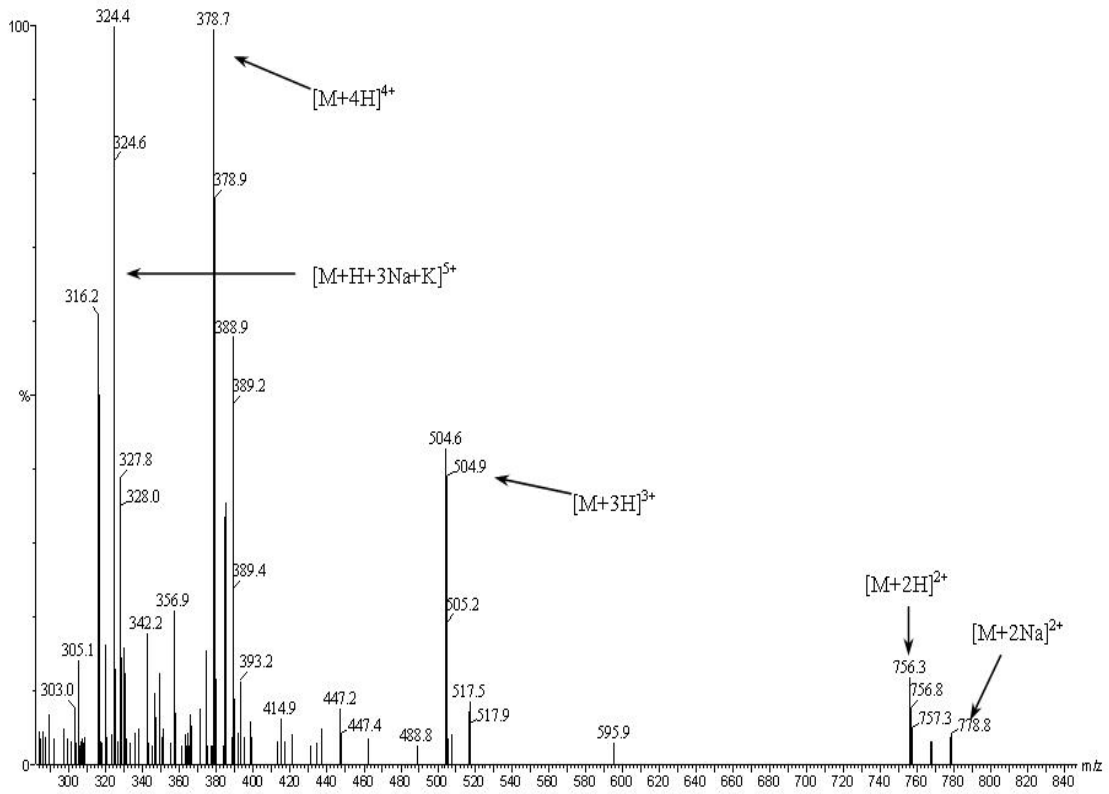

ST/SP7(POMA5)

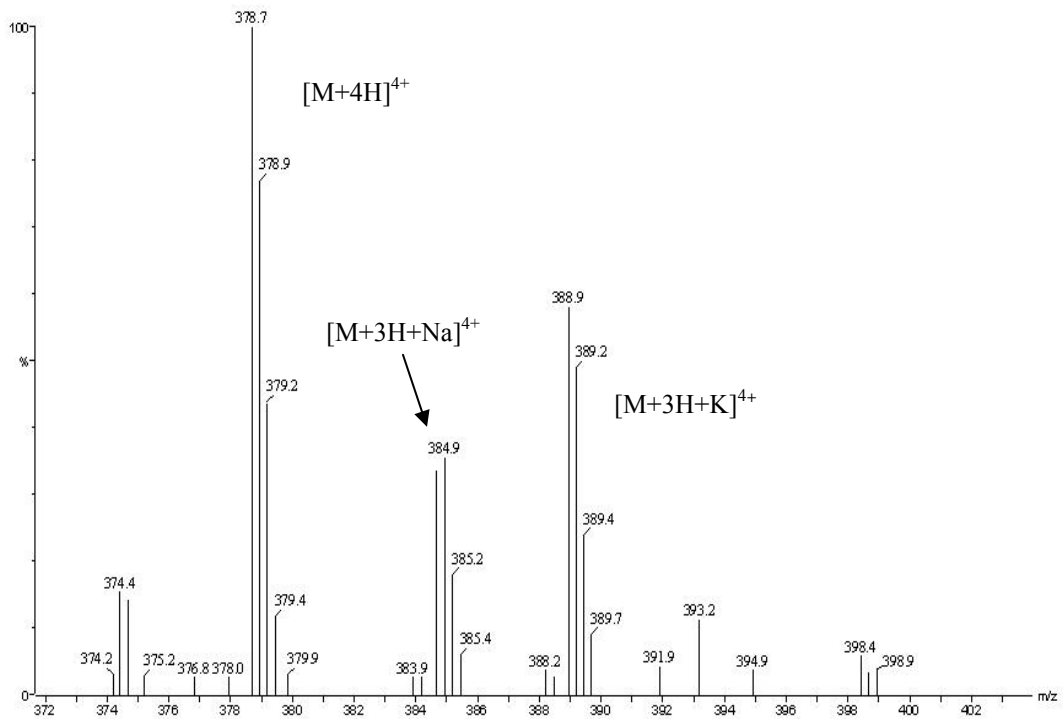

**Figure 4.** ES-MS spectra of Lys-POM(A)<sub>5</sub>-NH<sub>2</sub> and expansion of peak clusters for quadruply charged region.

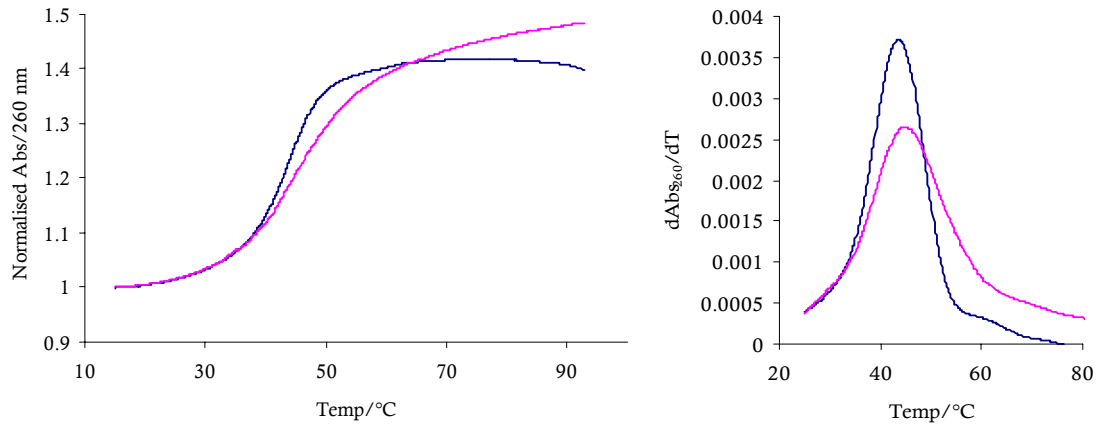

**Figure 5.** Lys-POM(T)<sub>5</sub>-LysNH<sub>2</sub> vs. poly(rA) at 42 μM in bases for each strand, 10 mM K<sub>2</sub>HPO<sub>4</sub>, 0.12 M K<sup>+</sup> and pH 7.0 (these conditions were used through out).  $T_m$  (Renaturation) = 43.6 °C;  $T_m$  (Denaturation) = 44.8 °C.

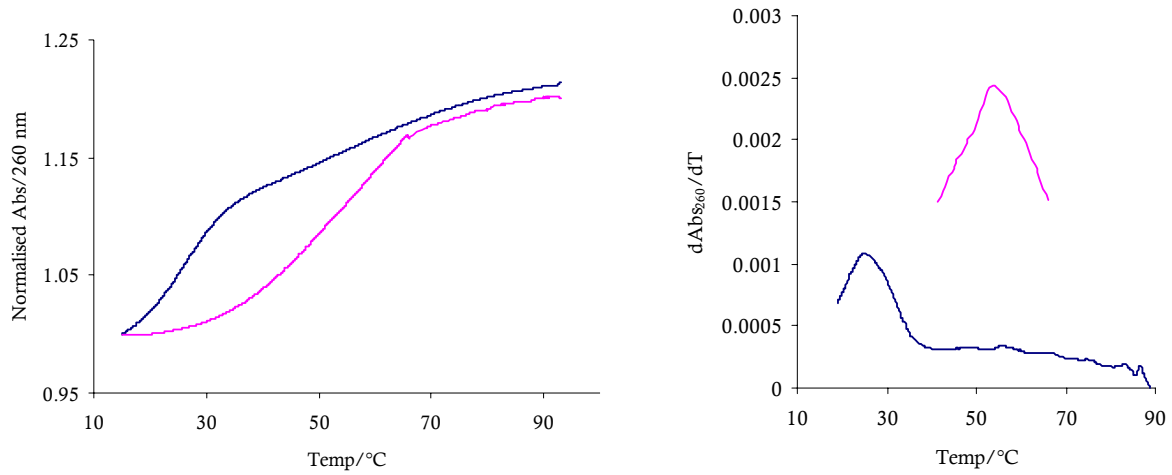

**Figure 6.** Lys-POM(T)<sub>5</sub>-Lys NH<sub>2</sub> vs. poly(dA).  $T_m$  (Renaturation) = 25.1 °C;  $T_m$  (Denaturation) = 54.4 °C.

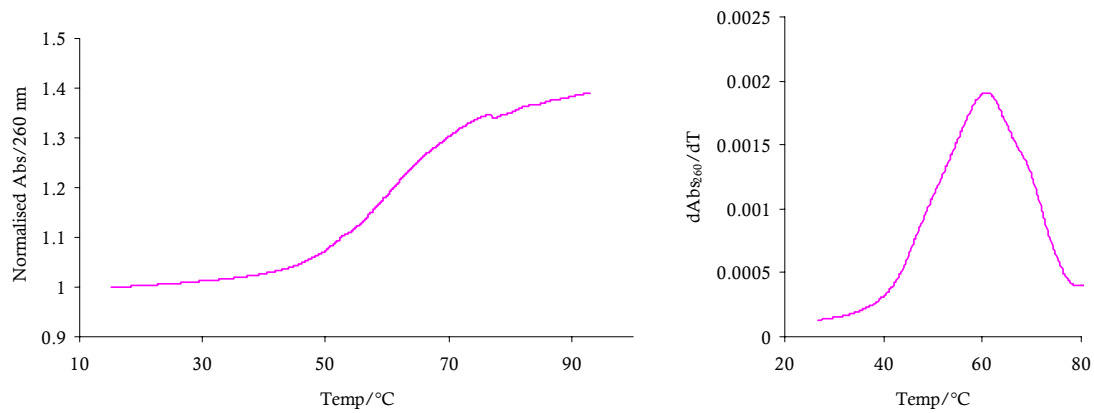

**Figure 7.** Lys-POM(T)<sub>5</sub>-Lys NH<sub>2</sub> vs. poly(dA).  $T_m$  (Denaturation) after 48 h incubation = 65.0 °C.

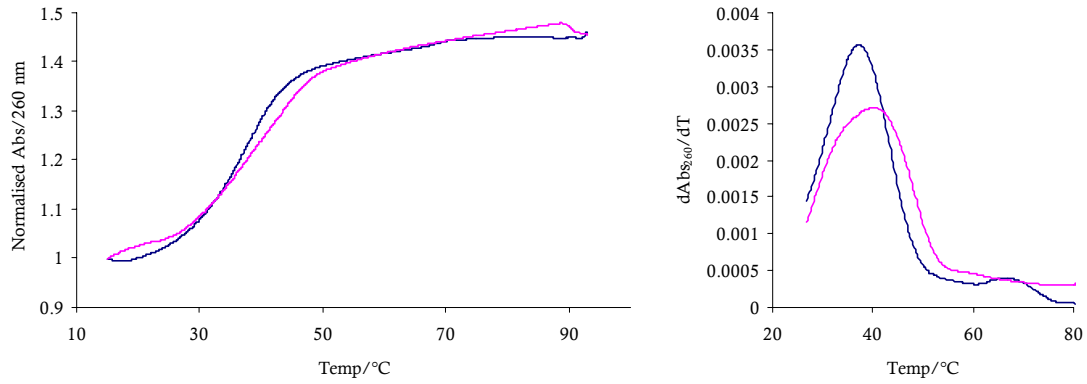

**Figure 8.** Lys-POM(T)<sub>5</sub>-Lys NH<sub>2</sub> vs. r(A)<sub>20</sub>.  $T_m$  (Renaturation) = 37.2 °C;  $T_m$  (Denaturation) = 40.2 °C.

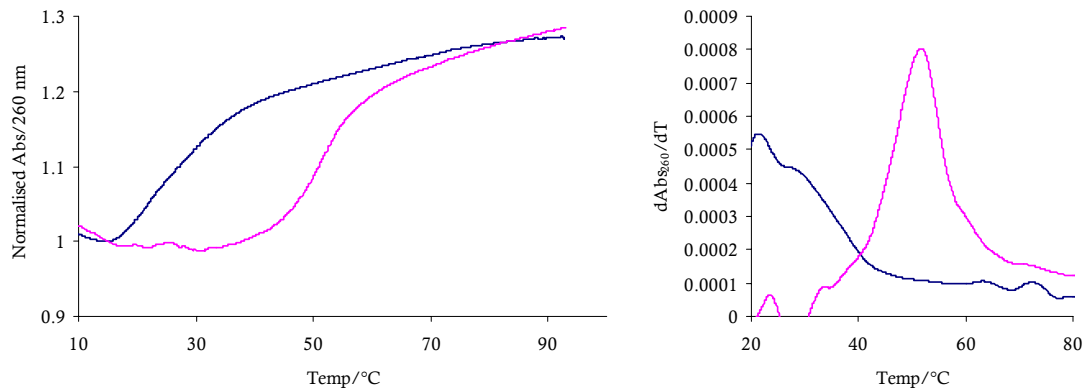

**Figure 9.** Lys-POM(T)<sub>5</sub>-LysNH<sub>2</sub> vs. d(A)<sub>20</sub>.  $T_m$  (Renaturation) = 51.6 °C;  $T_m$  (Denaturation) = 21.3 °C.

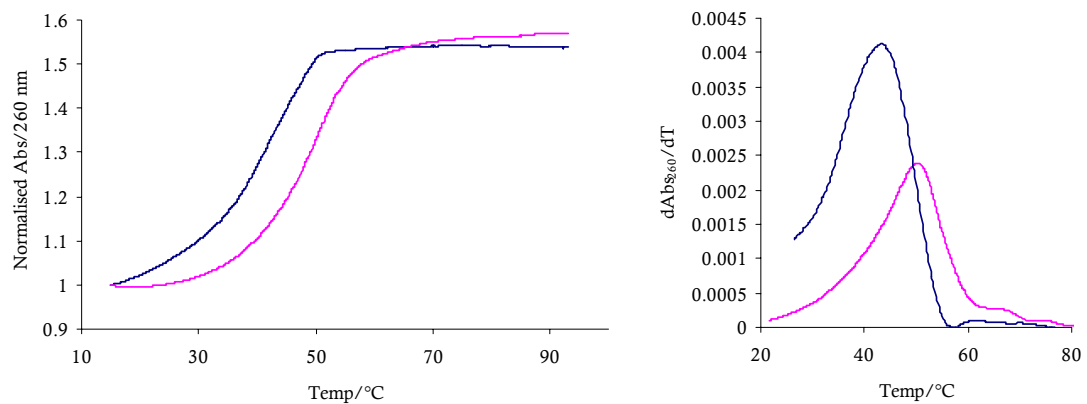

**Figure 10.** Lys-POM(A)<sub>5</sub>-NH<sub>2</sub> vs. poly(rU).  $T_m$  (Renaturation) = 43.3 °C;  $T_m$  (Denaturation) = 50.2 °C

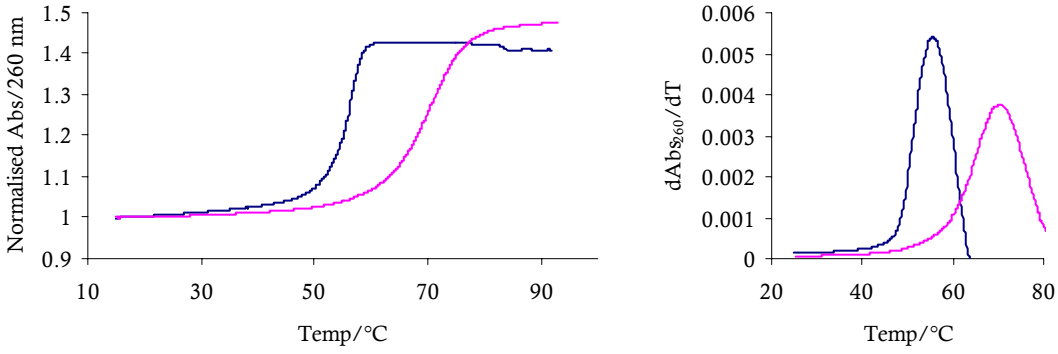

**Figure 11.** Lys-POM(A)<sub>5</sub>-NH<sub>2</sub> vs. poly(dT).  $T_m$  (Renaturation) = 55.6 °C;  $T_m$  (Denaturation) = 70.3 °C.

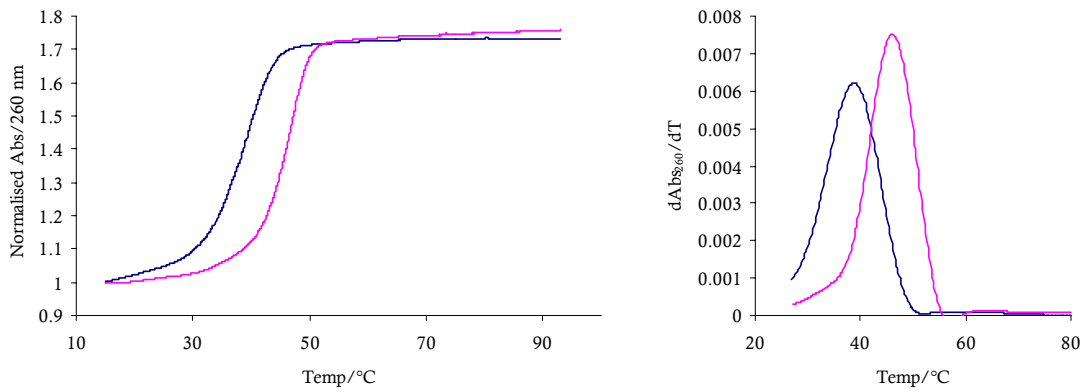

**Figure 12.** Lys-POM(A)<sub>5</sub>-NH<sub>2</sub> vs. r(U)<sub>20</sub>.  $T_m$  (Renaturation) = 38.8 °C;  $T_m$  (Denaturation) = 46.0 °C.

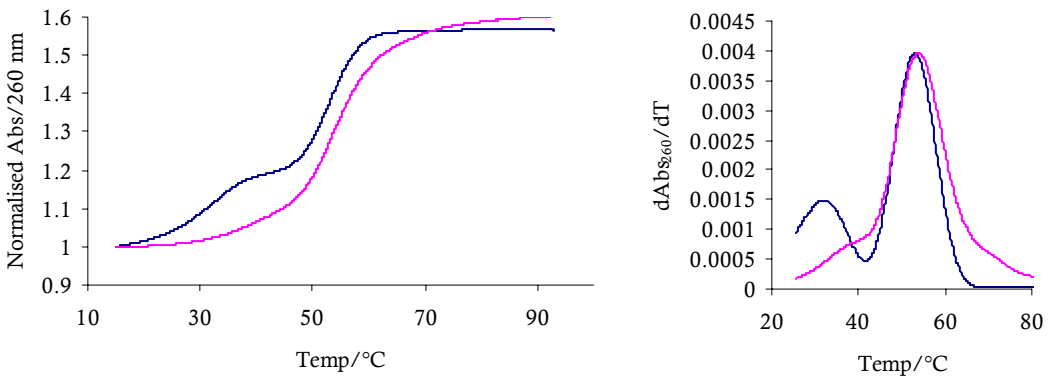

**Figure 13.** Lys-POM(A)<sub>5</sub>-NH<sub>2</sub> vs. d(T)<sub>20</sub>.  $T_m$  (Renaturation) = 31.8 & 53.0 °C;  $T_m$  (Denaturation) = 54.0 °C.



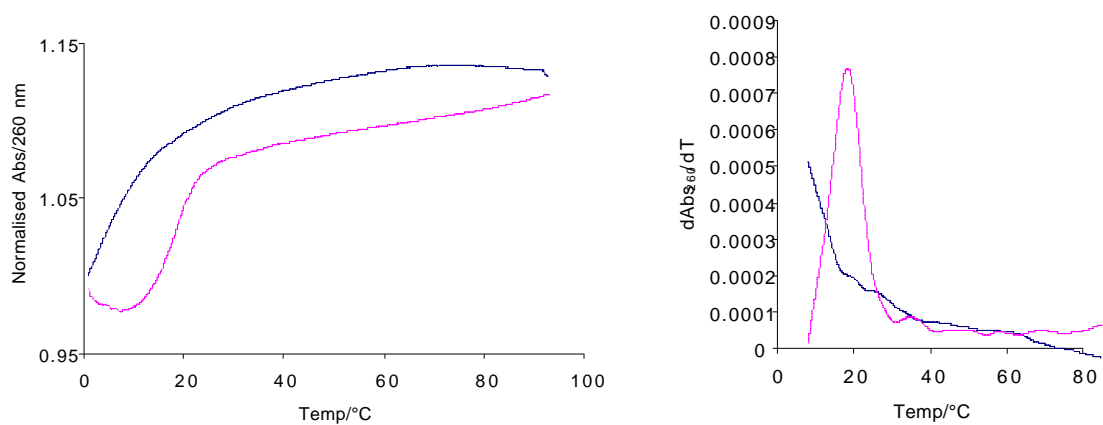

**Figure 11** Lys-POM(A)<sub>5</sub>-NH<sub>2</sub> vs. r(U)<sub>5</sub>.  $T_m$  (Renaturation) <10 °C;  $T_m$  (Denaturation) = 18.3 °C

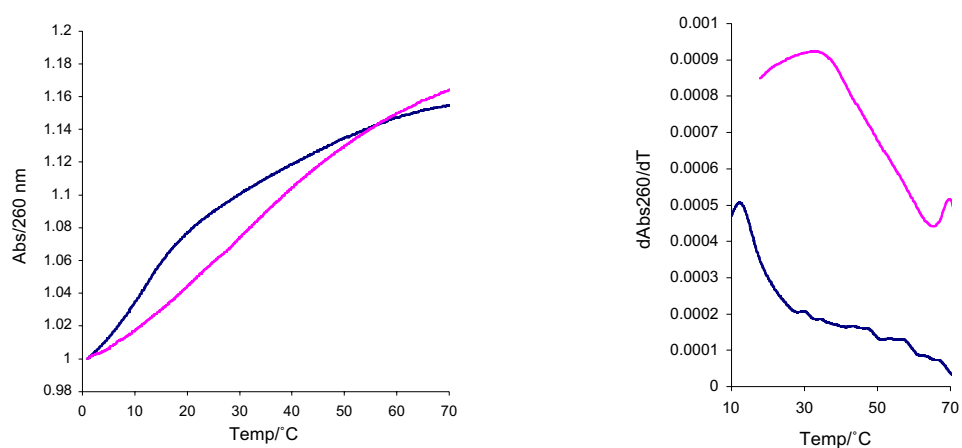

**Figure 12** Lys-POM(T)<sub>5</sub>-LysNH<sub>2</sub> vs. r(A)<sub>5</sub>.  $T_m$  (Renaturation) 13.6 °C;  $T_m$  (Denaturation) = 34.5 °C

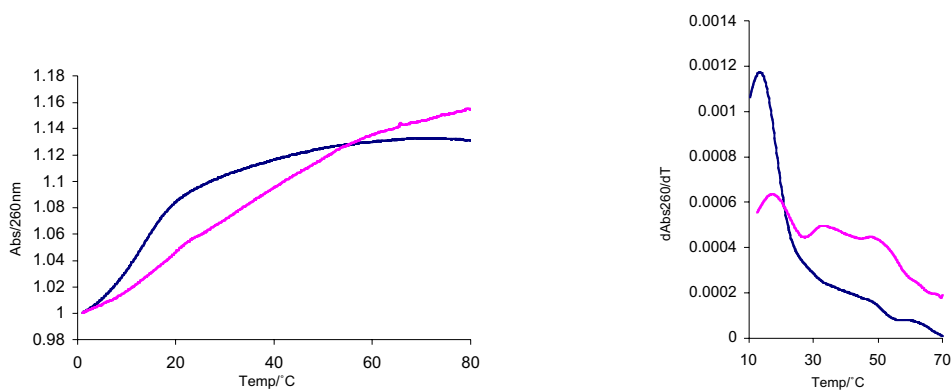

**Figure 13** Lys-POM(T)<sub>5</sub>-LysNH<sub>2</sub> vs. r(AAGAA).  $T_m$  (Renaturation) 14.2 °C;  $T_m$  (Denaturation) = 18.2 °C.

| $T_m/^\circ\text{C}$ (% hypochromic/hyperchromic shift) |                    |           |
|---------------------------------------------------------|--------------------|-----------|
|                                                         | $d(\text{T})_{20}$ |           |
|                                                         | cooling            | heating   |
| Poly(rA)                                                | 43.3 (29)          | 43.7 (31) |
| Poly(dA)                                                | 48.4 (30)          | 48.8 (32) |
| r(A) <sub>20</sub>                                      | 40.6 (25)          | 41.2 (26) |
| d(A) <sub>20</sub>                                      | 46.9 (23)          | 47.5 (30) |
|                                                         | $d(\text{A})_{20}$ |           |
|                                                         | cooling            | heating   |
| Poly(rU)                                                | 34.5 (24)          | 35.0 (24) |
| Poly(dT)                                                | 49.6 (30)          | 50.1 (31) |
| r(U) <sub>20</sub>                                      | 20.3 (25)          | 21.3 (26) |
| d(T) <sub>20</sub>                                      | 46.9 (29)          | 47.5 (31) |
| r(U) <sub>5</sub>                                       | n.b.               | n.b.      |

**Table 2.**  $T_m$ s for DNA 20mers,  $d(\text{T})_{20}$  and  $d(\text{A})_{20}$ , with complementary DNA and RNA. Experiments were carried out as described in table 1 of the main manuscript.
